22 communication and social mobilization strategies to promote and reinforce those  
23 prevention actions that, in turn, should be effective from the entomological standpoint.

24       Methodology/Principal Findings: Articles published in English, Spanish, and  
25 Portuguese, were reviewed to assess whether educational interventions targeting *Aedes*  
26 were effective in reducing entomological indicators or in improving practices to prevent  
27 the presence of or eliminate breeding sites. The most widely used indicators were the  
28 larval indices, and the practices to reduce/eliminate breeding sites. We found that using a  
29 community-based approach adapted to the eco-epidemiological and sociocultural  
30 scenarios explain the reduction of entomological indicators by educational interventions.

31       Conclusions/Significance: Those who design or implement educational interventions  
32 should strengthen the evaluation of those interventions using qualitative approaches that  
33 provide a more complete picture of the social context and barriers/facilitators to  
34 implementing vector control. Engaging school children in cross-sectorial collaboration  
35 involving the health and education spheres promotes the participation of the community  
36 in vector surveillance and reduces the risk of arboviral disease transmission.

## 37       **Author summary**

38       Dengue, Zika, and chikungunya are mosquito-borne diseases that represent a major  
39 global public health problem. These diseases are transmitted mainly through the bite of  
40 the *Aedes aegypti* vector mosquito and, to a lesser extent, *Ae. albopictus*. Getting people  
41 involved in prevention and elimination of mosquitos in their communities requires  
42 communication and social mobilization strategies to promote and reinforce those  
43 prevention actions that, in turn, should be effective from the entomological standpoint.  
44 The success of vector control programs has been demonstrated to lie in a comprehensive  
45 effort involving key community participation and intersectoral alliances. In addition, the

46 participation of schoolchildren to mobilize their families in the prevention of breeding  
47 sites and the management of mosquito populations is recommended. In this article, we  
48 proposed to conduct a systematic review of scientific publications that evaluate the effects  
49 of educational interventions on *Aedes* through entomological indicators. As a result, we  
50 obtained only 26 articles that evaluated the efficacy of educational interventions in  
51 reducing vector populations out of 732 articles reviewed. The selected articles were  
52 published in both English and Spanish, and to a lesser extent in Portuguese, which  
53 highlights the importance of avoiding language bias in systematic reviews. As a  
54 conclusion of our work, we can mention that the interventions that incorporated the social  
55 context and the barriers/facilitators for the implementation of vector control were the most  
56 successful. In addition, we emphasize the importance of involving schoolchildren to  
57 promote community participation in vector surveillance.

## 58 **Introduction**

59 Arboviral diseases, including dengue, yellow fever, chikungunya and Zika, are major  
60 public health problems in tropical and subtropical areas [1] and temperate regions where  
61 they are emerging [2, 3]. Half of the world's population is estimated to be at risk of dengue  
62 infections. Every year, 100 and 400 million dengue infections occur [4, 5]. Dengue is  
63 transmitted by the *Aedes aegypti* mosquito vector and, to a lesser extent, *Ae. albopictus*  
64 [5]; other mosquito species can be vectors in specific geographic contexts [6]. *Ae. aegypti*  
65 and *Ae. albopictus* can transmit other arboviruses, like Zika, Chikungunya, and Yellow  
66 Fever [7].

67 Preventing dengue and other arboviruses critically depends on controlling vectors to  
68 interrupt virus transmission. This strategy will likely remain a priority even when a  
69 vaccine becomes available [8, 9]. Successful vector management programs depends on  
70 comprehensive efforts to involve communities and cross-sectoral partners [10].

71 In this context, community education is crucial in promoting actions to eliminate  
72 vector breeding sites [11]. The World Health Organization (WHO) and the Pan American  
73 Health Organization (PAHO) [12] recommend, as a primary strategy, establishing a link  
74 with schools, with direct involvement of schoolchildren to mobilize their families in the  
75 prevention of breeding sites and management of mosquito populations [13].

76 Getting people involved in the prevention and elimination of vector breeding sites  
77 in their communities requires communication and social mobilization strategies to  
78 promote and reinforce prevention actions that, in turn, should be effective from the  
79 entomological standpoint [14]. In the case of dengue, the presence and abundance of  
80 vector populations are evaluated using entomological indicators, which are understood as  
81 proxies for dengue risk (presence of breeding sites, house index, container index, Breteau  
82 index, pupae per person index, and pupae per hectare index) [15].

83 Several articles have analyzed educational interventions aimed at promoting  
84 knowledge and prevention practices about dengue and other arboviral diseases; however,  
85 to date, no systematic reviews have explored the effect of those interventions on vector  
86 populations. The aims of the present work were: i) to conduct a systematic review of  
87 scientific publications that evaluate the effects of educational interventions on *Ae. aegypti*  
88 through entomological indicators and ii) to evaluate the effect of the interventions in  
89 reducing entomological indices and improving vector control practices.

## 90 **Method**

91 A systematic literature review was conducted using the following databases:  
92 Medline (PubMed), Science Direct (Scientific Electronic Library Online), LILACS  
93 (Latin American and Caribbean Health Sciences Literature) and Redalyc (Network of  
94 Scientific Journals of Latin America and the Caribbean, Spain, and Portugal). For this,  
95 the terms “Dengue” and “*Aedes aegypti*” were combined with “education”, “schools” and

96 “educational interventions” by the Boolean connector AND, and were used to search in  
97 the article title or abstract. The terms were adapted to the search modes of each database;  
98 thus, in the case of PubMed, the descriptors “education”, “schools” and “educational  
99 interventions ” were replaced with the terms [MeSH] (Medical Subject Headings) “health  
100 education” and “education”.

## 101 **Eligibility criteria and search strategy**

102 The search was restricted to the 2011-2021 period. The search terms used were  
103 both in Spanish and English to avoid introducing a language bias. In turn, no language  
104 restrictions were applied; therefore, articles published in other languages were not  
105 excluded. For an article to be included in the review, it had to: i) be published in indexed  
106 journals, ii) have free access to full text, and iii) be developed in formal/informal  
107 education contexts. Studies with an economic, sociological or epidemiological focus were  
108 not included.

109 Article selection for in-depth analysis was a two-stage process. During the first  
110 stage, two researchers identified and screened the titles and abstracts independently,  
111 following the eligibility criteria. The articles were incorporated into a predesigned  
112 spreadsheet with the items: database where they were included, year of publication, first  
113 author, journal, matches with the selection criteria and remarks on any observations that  
114 may arise. The search results of both researchers were compared and imported into  
115 Mendeley free software, and duplicates were removed. In the second evaluation stage,  
116 the articles were thoroughly read and those that evaluated the impact of education  
117 interventions through entomological indicators (house index, container index and Breteau  
118 index, or the presence and/or abundance of *Ae. aegypti* in any of its development stages)  
119 or prevention practices related to the elimination or control of breeding sites were  
120 included. The article selection process is presented in Figure 1.

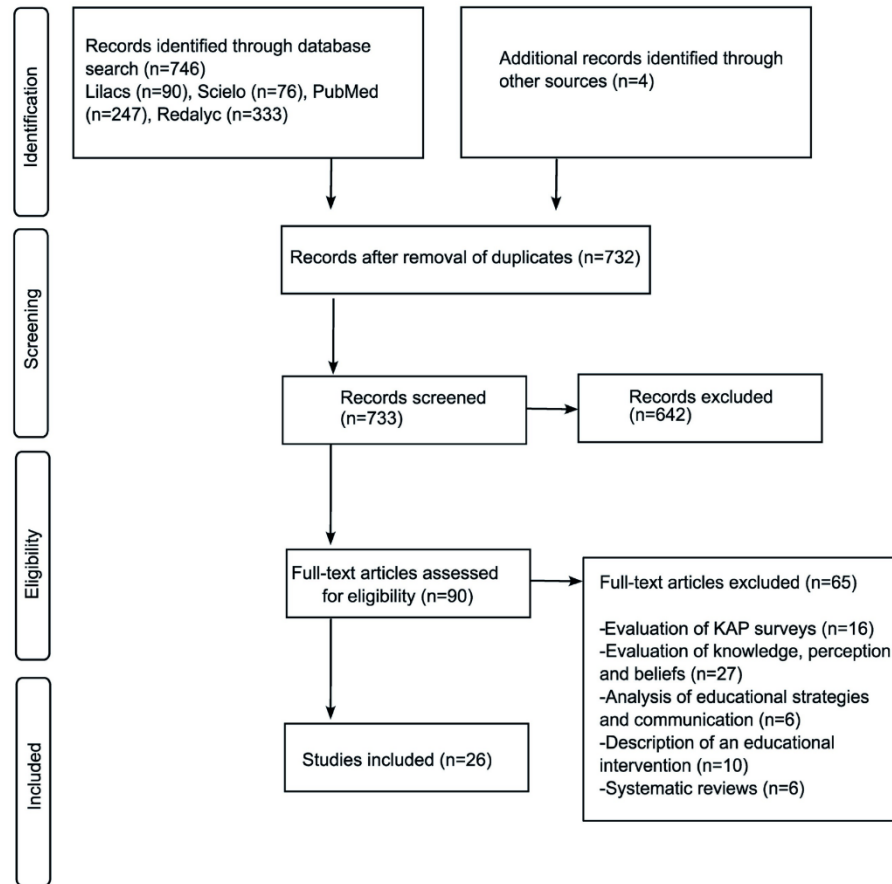

121

122 **Figure 1. Process for the selection of published articles to be included in the**  
123 **systematic literature review.**

124 Finally, the references cited in the selected articles were also reviewed to include  
125 other relevant articles that were not found during the database search. Any discrepancies  
126 during the first or second selection stages were resolved by mutual agreement between  
127 the reviewers. Quality of the analysis presented in the articles was not evaluated. In this  
128 sense, the risk of including articles with biased results or bias between articles was not  
129 assessed.

## 130            **Analysis:**

131            The selected articles were coded using the software Atlas Ti. The topics found  
132            during reading of the articles were summarized in descriptive topics. In a subsequent  
133            interpretation stage, the descriptive topics identified during this process were used to  
134            elaborate the criteria to select the articles. The articles were classified according to  
135            working aim, study area and target group of the educational intervention. The data  
136            presented in the works were not analyzed quantitatively.

## 137            **Results**

138            Of all the articles searched, a small percentage (3.5%; 26/746) evaluated  
139            educational interventions using entomological indicators and most of them focused  
140            exclusively on *Aedes aegypti*. The interventions were conducted in South and Central  
141            America and in Asia, during years of high incidence of dengue and other arboviruses. No  
142            educational interventions evaluated by entomological indicators were implemented on  
143            temperate regions of the world.

144            Community mobilization through educational interventions had a positive impact  
145            on the management of *Aedes* breeding sites.

## 146            **Description of the selected articles**

147            The articles selected were published in Spanish, English and Portuguese. Most of  
148            the studies were conducted in South and Central America, mainly in Colombia, followed  
149            by South East Asia, and South Asia (Fig 2, Table 1). The authors used a total of 37  
150            indicators to evaluate the educational interventions (Table 2).

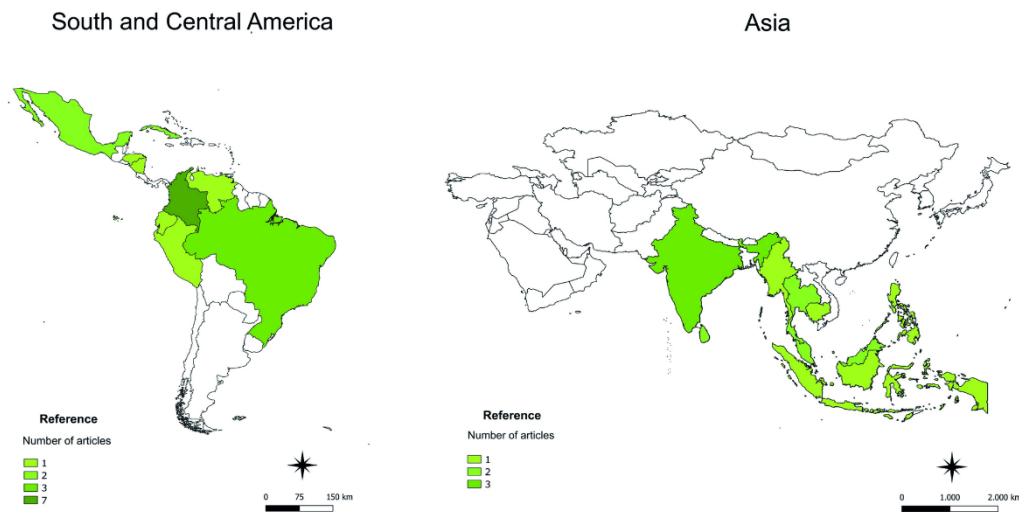

151

152 **Figure 2. Distribution of articles evaluating educational interventions about *Aedes***  
 153 **spp. through knowledge, attitudes and practice (KAP) surveys and entomological**  
 154 **indicators.**

155 **Table 1. Description of the articles selected for in-depth analysis**

| Country                                        | Number | Year of publication | Authors                                 | Title                                                                                                                                         | Target group                         |
|------------------------------------------------|--------|---------------------|-----------------------------------------|-----------------------------------------------------------------------------------------------------------------------------------------------|--------------------------------------|
| <b>South and Central America (18 articles)</b> |        |                     |                                         |                                                                                                                                               |                                      |
| Colombia                                       | 7      | 2011                | Restrepo et al. [35]                    | Aplicación y evaluación de materiales educativos para la prevención del dengue en una institución educativa de Medellín, Colombia.            | Primary schoolchildren               |
|                                                |        | 2013                | Carabalí et al. [21]                    | Difusión masiva de reportes situacionales sobre dengue: Efectos de la intervención en Guadalajara de Buga, Colombia.                          | Community                            |
|                                                |        | 2013                | Escobar Ramírez et al. [25]             | Efectividad de la estrategia para la prevención del dengue en un barrio del municipio de Floridablanca 2011-2012.                             | Community                            |
|                                                |        | 2015                | Escudero Támara & Villareal Amaris [26] | Intervención educativa para el control del dengue en entornos familiares en una comunidad de Colombia.                                        | Primary schoolchildren and community |
|                                                |        | 2016                | Overgaard et al. [33]                   | A cluster-randomized controlled trial to reduce diarrheal disease and dengue entomological risk factors in rural primary schools in Colombia. | Primary schoolchildren               |
|                                                |        | 2017                | Villareal et al. [38]                   | Intervención educativa para control de <i>Aedes aegypti</i> en un grupo de familias colombianas: una experiencia exitosa.                     | Primary schoolchildren and community |



|                          |   |      |                               |                                                                                                                                                                                                     |                                                             |
|--------------------------|---|------|-------------------------------|-----------------------------------------------------------------------------------------------------------------------------------------------------------------------------------------------------|-------------------------------------------------------------|
|                          |   | 2018 | Jaramillo et al. [29]         | Sostenibilidad en intervenciones para la prevención de dengue y diarrea en escuelas rurales de dos municipios de Colombia: evaluación de dos años post-proyecto.                                    | Primary schoolchildren                                      |
| Brazil                   | 3 | 2019 | Abel Mangueria et al. [16]    | The prevention of arboviral diseases using mobile devices: a preliminary study of the attitudes and behaviour change produced by educational interventions.                                         | University students                                         |
|                          |   | 2015 | Caprara et al. [20]           | Entomological impact and social participation in dengue control: a cluster randomized trial in Fortaleza, Brazil.                                                                                   | Primary schoolchildren and community                        |
|                          |   | 2013 | Cordeiro da Silva et al. [22] | Cooperação entre agentes de endemias e escolas na identificação e controle da dengue.                                                                                                               | Primary schoolchildren, vector control agents and community |
| Cuba                     | 2 | 2012 | Zayas Vinent et al. [39]      | La intersectorialidad en la prevención del dengue en un área de salud de Santiago de Cuba.                                                                                                          | Community                                                   |
|                          |   | 2016 | Criado Morales et al. [23]    | Procesos de participación comunitaria en la prevención del dengue barrio ciudadela del fonce.                                                                                                       | Community                                                   |
| Honduras                 | 1 | 2012 | Ávila Montes et al. [19]      | Un programa escolar para el control del dengue en Honduras: del conocimiento a la práctica.                                                                                                         | Primary schoolchildren and community                        |
| Mexico                   | 1 | 2014 | Torres et al. [37]            | Conocimientos, actitudes y prácticas sobre el dengue en las escuelas primarias de Tapachula, Chiapas, México.                                                                                       | Primary school children                                     |
| Nicaragua and México     | 1 | 2015 | Andersson et al. [18]         | Evidence based community mobilization for dengue prevention in Nicaragua and Mexico (Camino Verde, the Green Way): cluster randomized controlled trial.                                             | Community                                                   |
| Peru                     | 1 | 2020 | Ortiz Agui et al. [32]        | Estrategia comunicativa orientada a la reducción de la exposición a factores de riesgo de arbovirosis.                                                                                              | Primary schoolchildren                                      |
| Venezuela                | 1 | 2011 | García Guevara et al. [27]    | Una mirada etnográfica del conocimiento del dengue desde la perspectiva de un grupo de escolares. Unidad educativa nacional bolivariana "Armando Zuloaga Blanco" Distrito Capital, Venezuela. 2009. | Secondary school student                                    |
| Ecuador                  | 1 | 2015 | Mitchell-Foster et al. [41]   | Integrating participatory community mobilization processes to improve dengue prevention: an eco-bio-social scaling up of local success in Machala, Ecuador                                          | Primary schoolchildren and community                        |
| <b>Asia (8 articles)</b> |   |      |                               |                                                                                                                                                                                                     |                                                             |
| Malasia                  | 2 | 2013 | AbhiRami & Zuharah [17]       | School-based health education for dengue control in Kelantan, Malaysia: Impact on knowledge, attitude and practice.                                                                                 | Secondary school students                                   |
|                          |   | 2020 | Isa et al. [28]               | Mediational Effects of Self-Efficacy Dimensions in the Relationship between Knowledge of Dengue and Dengue Preventive Behaviour with Respect to Control of Dengue.                                  | Community                                                   |
| India                    | 2 | 2012 | Arunachalam [40]              | Community-based control of <i>Aedes aegypti</i> by adoption of eco-health methods in Chennai City, India.                                                                                           | Secondary school students and community                     |

|                                                             |   |      |                           |                                                                                                                                                                                         |                                      |
|-------------------------------------------------------------|---|------|---------------------------|-----------------------------------------------------------------------------------------------------------------------------------------------------------------------------------------|--------------------------------------|
|                                                             |   | 2016 | Nivedita [31]             | Knowledge, attitude, behaviour and practices (KABP) of the community and resultant IEC leading to behaviour change about dengue in Jodhpur City, Rajasthan.                             | Community                            |
| Cambodia                                                    | 1 | 2020 | Echaubard et al. [24]     | Fostering social innovation and building adaptive capacity for dengue control in Cambodia: a case study.                                                                                | Primary schoolchildren and community |
| Tailandia                                                   | 1 | 2012 | Kittayapong et al. [30]   | Application of eco-friendly tools and eco-bio-social strategies to control dengue vectors in urban and peri-urban settings in Thailand.                                                 | Community                            |
| Sri Lanka                                                   | 1 | 2019 | Radhika et al. [34]       | Level of awareness of dengue disease among school children in Gampaha District, Sri Lanka, and effect of school-based health education programmes on improving knowledge and practices. | Secondary school students            |
| India, Sri Lanka, Indonesia, Birmania, Filipinas, Tailandia | 1 | 2012 | Sommerfeld & Kroeger [36] | Eco-bio-social research on dengue in Asia: a multicountry study on ecosystem and community-based approaches for the control of dengue vectors in urban and peri-urban Asia.             | Community                            |

156

157 **Table 2. Indicators used in the reviewed articles to evaluate educational**  
 158 **interventions about *Aedes aegypti* or *A. albopictus*.**

|            |                                                | Entomological indicators of <i>Aedes aegypti</i> or <i>Aedes albopictus</i> |                      |                                  |                              |                                                                    |                                                                  |
|------------|------------------------------------------------|-----------------------------------------------------------------------------|----------------------|----------------------------------|------------------------------|--------------------------------------------------------------------|------------------------------------------------------------------|
| Indicators | Knowledge, attitudes and practice (KAP) survey | Presence of positive breeding sites (with larvae/pupae)                     | <i>Aedes</i> index * | HI, CI, BI†                      | Pupae per person index       | Density of <i>Aedes aegypti</i> larvae and pupae per breeding site | Proportion of schools with adult females of <i>Aedes aegypti</i> |
| References | [16, 17, 28, 31, 32, 35, 37]                   | [30, 29, 38, 26, 22, 39, 19, 27, 34, 35]                                    | [23, 24, 25]         | [18, 19, 20, 21, 33, 35, 40, 41] | [18, 20, 21, 30, 33, 40, 41] | [36]                                                               | [33]                                                             |

159

\* Articles that evaluated the educational intervention through the *Aedes* index but did not define or specify how they

160

calculated those indices. † References: HI: house index = number of houses with larvae of *Aedes* spp./total number of

161

inspected houses x 100; CI: container index = number of positive containers with *Aedes* spp. larvae / total number of

162

inspected containers with water x100; IB: Breteau index = Number of positive containers/ inspected houses x100

163

Of the educational interventions, two-thirds (65%) were performed in schools or

164

involved the participation of schoolchildren [16, 17, 19, 20, 22, 24, 26, 27, 29, 32, 33, 34,

165

35, 37, 38, 40, 41]. One-third (35%) were focused on the community, with no

166

participation of students [18, 21, 23, 25, 28, 30, 31, 36, 39]. The interventions that targeted

167 the community encouraged home dwellers to perform activities to prevent or eliminate  
168 vectors in their homes through interventions designed and implemented by research  
169 groups [21, 23, 25, 28, 31] or vector control programs [18, 30, 36, 39].

170 Diverse education tools were used in the studies (Fig 3). Varona Delmonte et al.  
171 [42] defines educational tools as methods or activities used to teach a skill or concept. An  
172 important aspect to highlight is the heterogeneity among authors regarding the education  
173 tool used. Some studies [17, 21, 22, 23, 28, 31, 34, 35, 38] included a training event about  
174 concepts and prevention practices against dengue. In those events, the distribution of  
175 leaflets, talks, and screening of animated films were the prevailing features. These tools  
176 were used one to three times with the target group and were employed by research groups.  
177 Other studies [16, 18, 19, 20, 27, 29, 30, 32, 33, 36, 37, 39, 40, 41] applied theoretical-  
178 practical education tools. In particular, they conducted programs that lasted between 40  
179 days and six years, which in general involved the coordination of different social actors  
180 in the design, implementation and evaluation of the educational intervention including  
181 teachers, researchers, community leaders, community health workers providing services  
182 on a voluntary basis (e.g., *brigadistas*), students, and members of health and environment  
183 departments. These studies mainly focused on home visits to detect breeding sites, focus  
184 groups, and community engagement in the design of the response to the problem.

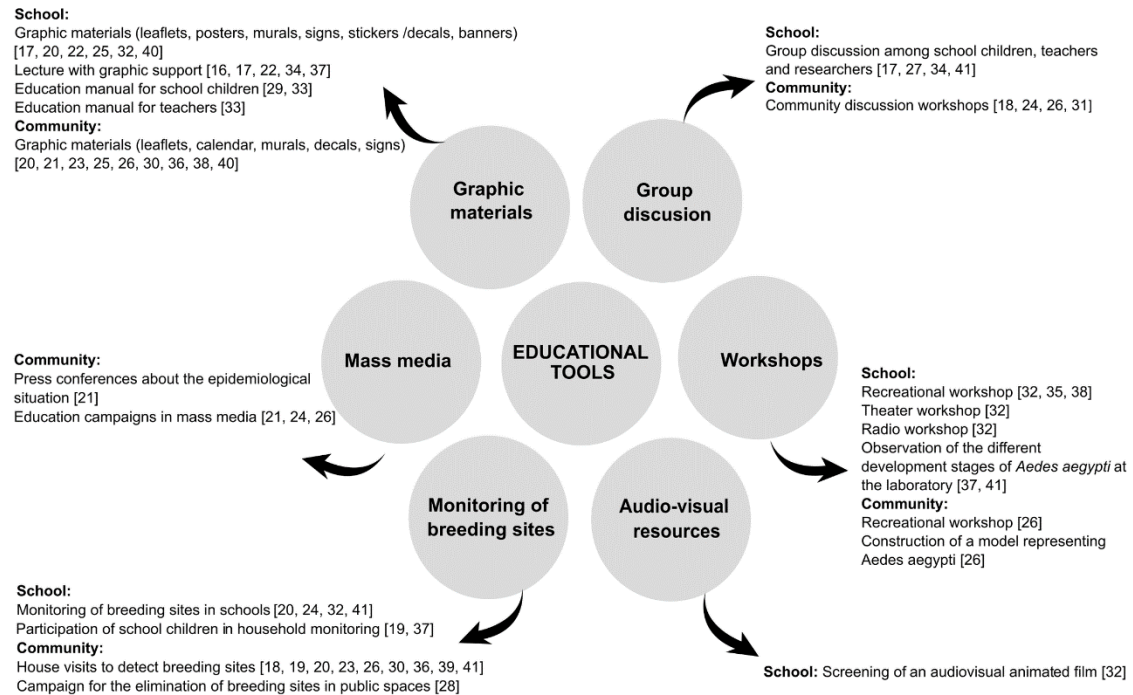

185

186 **Figure 3. Educational instrument or tool used in the articles selected for the**  
187 **systematic review.**

188 Most educational interventions focused on eliminating the presence of *Ae. aegypti*.  
189 Two studies included *Ae. albopictus*, [18, 34] and three studies referred to the vectors as  
190 *Aedes* mosquitoes [21, 26, 28].

191 **Evaluation of educational interventions through knowledge,**  
192 **attitudes, and practices (KAP) surveys**

193 Some interventions, especially those related to the validation of education tools [16,  
194 35, 37], communication strategies [32] or awareness-raising programs [17, 31], evaluated  
195 their effects on vector populations indirectly or through KAP surveys. The authors of  
196 those articles indicated that they educated people about dengue or mosquito vectors,  
197 which had a positive effect on the implementation of practices to prevent or eliminate  
198 adult vectors or larval habitats [16, 17, 31, 32, 35, 37]. They evaluated these practices

199 through surveys including avoiding the presence of breeding sites [16], turning containers  
200 upside down, sealing containers hermetically, or washing containers to avoid water  
201 accumulation [31, 32], removing containers [35], and setting traps for adult mosquitoes  
202 [16].

203 Research groups conducted all of the KAP studies. Four were implemented in  
204 primary or secondary schools [17, 32, 35, 37], and one involved university students [16].  
205 In contrast, only one was devoted to the community and consisted of surveying an adult  
206 in a house at the moment of the visit [31].

## 207 **Evaluation of educational interventions aimed at the** 208 **community through entomological indicators**

209 Of the interventions involving the general community, 90% used one of the  
210 entomological indicators [18, 21, 23, 25, 28, 30, 36, 39]. In general, the interventions  
211 resulted in a statistically significant reduction in entomological indicators, including the  
212 presence of breeding sites of *Ae. aegypti* larvae [30, 39], indices of *Ae. aegypti* larvae [18,  
213 21, 23, 28, 41], pupal indices [21, 18, 41], and the density of larvae and pupae per breeding  
214 site [36]. Other indicators, such as qualitative and quantitative indicators of  
215 empowerment, collaboration, and community mobilization, were also used in some  
216 studies [18, 25, 36].

217 The educational interventions were mostly designed based on a diagnosis of  
218 community knowledge about the role of vectors in dengue transmission. Diverse  
219 educational tools (presented in detail in Fig 3) were implemented to evaluate the effects  
220 of educational interventions on entomological indicators.

221 Other indicators to measure the effectiveness of the educational intervention  
222 included: the identification of risk factors favoring the presence of breeding sites in the  
223 houses [23], changes in human behaviors relative to vector prevention [25], and the

224 environmental risks that made implementation easier or more difficult [39]. Isa et al. [28]  
225 state that changes in preventive behaviors will not be effective unless the intervention  
226 also increases people's confidence in their capacity to perform such behaviors. In turn,  
227 Carabali et al. [21] state that a fundamental element to stimulate community participation  
228 is providing feedback on the impact of an educational intervention.

229         Some studies focused on evaluating the effect of educational interventions on  
230 vector control compared to traditional chemical control. Andersson et al. [21],  
231 Kittayapong et al. [30] and Mitchell-Foster et al. [41] presented evidence of the greater  
232 effectiveness of physical control of potential vector breeding sites coupled with  
233 educational interventions compared to the conventional chemical control of dengue.  
234 Similarly, Sommerfeld & Kroegel [36] reported the positive results of implementing  
235 interventions to reduce vector reproduction over five years in six Asian countries;  
236 interventions were based on education efforts, along with chemical, mechanical or  
237 biological treatments.

238         In some studies, key actors (community leaders, staff from the municipal program  
239 for vector control, health and education sector staff) were trained as *brigadistas*. Visited  
240 houses to show the dwellers the evidence of larval/pupa infestation in water containers,  
241 to assess general knowledge about dengue and to inform them about the mosquito life  
242 cycle and prevention measures [18, 30, 36, 41].

## 243 **Educational interventions with schoolchildren that were** 244 **evaluated by entomological indicators**

245         Of the 17 articles reporting the participation of schoolchildren, 71% used an  
246 entomological indicator to evaluate the effect of the intervention on vector populations.  
247 The authors concluded that the interventions were efficient in raising awareness and  
248 improving the attitudes of the school communities regarding the maintenance of a safe

249 environment with a low level of vector infestation. However, some weaknesses were  
250 reported by Overgaard et al. [33], who highlighted that the favorable results –e.g., the  
251 knowledge acquired and practices for the prevention of breeding sites– observed during  
252 the intervention were not sustained after the intervention was finished.

253         Among the articles included in this section, educational interventions were  
254 implemented as part of the interventions for community-based ecosystem management,  
255 or Ecohealth approaches, to reduce entomological indices. The schoolchildren  
256 collaborated in community interventions, mainly as mobilizers and message  
257 disseminators [20, 24, 40] or in actions to eliminate mosquito breeding sites in their  
258 homes [41]. According to Echaubard et al. [24], implementing an Ecohealth strategy  
259 allowed them to achieve a cross-sector linkage among the community, teachers, heads of  
260 schools, and representatives of the Ministry of Education, who redefined the school  
261 curriculum to include dengue information. Other interventions proposed by research  
262 groups aimed at preventing breeding sites in houses by the training of schoolchildren [26,  
263 38].

264         Using an ethnographic approach, García Guevara et al. [27] analyzed the presence  
265 of vectors by generating maps of the school with the distribution of the potential *Ae.*  
266 *aegypti* breeding sites. They evaluated students' knowledge and compared it to the public  
267 health messages delivered via massive communication campaigns. These authors  
268 observed that students reproduced the campaign message with a reduced and  
269 decontextualized vision of prevention.

## 270 **Discussion**

271         The results obtained in this review show that while there are numerous articles on  
272 educational interventions for the control of *Aedes*, few have evaluated these interventions  
273 using entomological indicators or assessments of vector prevention practices. It should

274 be noted that 70% of the educational interventions were implemented in South and  
275 Central America, and 46% and 4% of the articles were published in Spanish and  
276 Portuguese, respectively. A strong feature of this systematic review is that it includes  
277 publications in languages other than English [43]. The high proportion of articles in  
278 Spanish points to the importance of including knowledge about dengue and other  
279 arboviral diseases published in local scientific journals in countries where *Ae. aegypti*-  
280 transmitted diseases pose a significant threat to community health. Most articles focused  
281 on *Ae. aegypti*; only two articles conducted in Malaysia and Sri Lanka [17, 34] considered  
282 *Ae. albopictus*. The lack of studies on *Ae. albopictus* is a key gap, given its potential role  
283 in arboviral transmission growing distribution of this mosquito species [44-46].

284 We found that educational interventions were performed mainly in schools or with  
285 the participation of schoolchildren, whereas the remaining interventions were aimed at  
286 the community. Among the latter, few studies clearly characterized the target community  
287 group or social actors. In this sense, we agree with Bang [47] in that there is a lack of  
288 consensus about the concept of *community* in disease prevention practices.

289 The articles selected in this review did not compare the efficacy of the different  
290 education tools applied in the interventions; instead, they evaluated the impact on various  
291 end points (improving knowledge and prevention practices or reducing entomological  
292 indicators). Al-Muhandis & Hunter [48] and Vázquez-Torres et al. [49] mention that no  
293 studies have been conducted to compare different education tools, presenting an exciting  
294 line of future research.

295 In the articles evaluated in this review, the most widely used tools to develop  
296 educational interventions were the monitoring of breeding sites in schools and homes and  
297 the distribution of graphic materials (flyers, manuals, posters, etc.). In some cases, the  
298 tools included games, theatre workshops, radio workshops, and an audiovisual



299 presentation. The use of play-based strategies and the direct participation of students in  
300 controlling mosquitoes in their houses is recommended, since they were presented as the  
301 most attractive and effective education strategies to address dengue among children and  
302 adolescents in schools according to Diaz Gonzalez [50] in a systematic review on health  
303 education initiatives.

304       Regarding the evaluations of the interventions, one-third of the articles focused  
305 on schoolchildren used pre-test and post-test KAP surveys. Those questionnaires have  
306 been widely used to diagnose misconceptions or misinterpretations and to know the  
307 opinion of specific communities about a problem [51]. Several authors mention that  
308 educational interventions to address vector borne diseases (e.g., malaria, Chagas, dengue,  
309 chikungunya, and Zika) improved knowledge and induced positive changes in the  
310 practices to prevent and control vectors, as assessed by KAP surveys [52-56].

311       The most widely used entomological indicators were the presence of breeding  
312 sites and/or container, house and Breteau indices. This result is consistent with the review  
313 conducted by Ballenger-Browning & Elder about vector control interventions to reduce  
314 mosquito populations [57].

315       Several authors, like Ballenger-Browning & Elder [57], Heintzer et al. [58] and  
316 Erlanger et al. [59], discuss the use of larval indexes as entomological indicators to  
317 evaluate educational interventions and highlight that it was not possible to measure  
318 whether interventions that promote community participation in vector control were able  
319 to effectively reduce dengue transmission. These authors suggest that serological  
320 surveillance should be a necessary component of all dengue interventions and a standard  
321 entomological index should be used to compare interventions. In addition, entomological  
322 indices estimated through larva collection are imperfect indicators of disease transmission  
323 risk [60, 61]. Andersson et al. [18] was the only evidence found that incorporated - in

324 addition to the reduction of entomological indicators - serological analysis as an indicator  
325 of the effectiveness of the educational intervention. But the results of the community  
326 serological analysis are not yet available.

327 Therefore, we cannot ascertain whether educational strategies assessed via  
328 entomological indicators successfully reduced virus transmission. Active surveillance  
329 studies and serological surveys would be needed to measure changes in disease  
330 transmission pre and post intervention. Instead, entomological indicators provide  
331 information to evaluate whether people adopt practices to reduce or eliminate vectors,  
332 which is the aim of educational interventions.

333 Some articles performed an in-depth analysis of the relationship between  
334 educational intervention and practices to achieve source reduction/elimination of  
335 breeding sites. The authors explain that incorporating actions to prevent breeding sites  
336 requires that people have confidence in the benefits of those actions to their health and  
337 that they receive feedback on the results of the interventions they participate in. Those  
338 who design or implement educational interventions should strengthen the evaluation of  
339 those interventions using qualitative approaches that provide a more complete picture of  
340 the social context and barriers/facilitators to implementing vector control.

341 Another group of articles conducted interventions from an eco-bio-social  
342 approach, involving different social actors. The results show that combining the education  
343 strategy with other vector control strategies contributed to the reduction of both larval  
344 indices and pupal densities. Andersson et al. [18] and Kittayapong et al. [30] mention that  
345 educational interventions framed as community-based Ecohealth strategies are more  
346 efficient in reducing vector populations and transmission than conventional chemical  
347 control. These findings are in agreement with results of Espinoza-Gómez [62].  
348 Educational interventions made within the eco-bio-social frame and that involved

349 community engagement were the most efficient vector control strategies at the global  
350 level [48, 49, 59, 62-64].

351 Several studies focused on school- or student-centered interventions to address a  
352 range of vector-borne diseases [65, 68]. The programs consisted of play-based activities  
353 to engage the students' families in interventions to prevent the presence of or eliminate  
354 breeding sites in their houses. The main indicators evaluated were the reduction of the  
355 presence of breeding sites, house, container and Breteau indices, and to a lesser extent,  
356 pupal density. These results are encouraging since schools are essential in gathering  
357 community members, and students can act as a crucial link to transmit educational  
358 interventions [69].

359 Through a systematic review, Vázquez-Torres et al. [49] observed that the  
360 participation of students improves their knowledge about and application of dengue  
361 prevention measures, which had a significant effect on the reduction of entomological  
362 indicators in the school. The articles included in the present review agree with Vázquez-  
363 Torres et al. [49] on the importance of health education to improve knowledge and  
364 prevention practices regarding arboviral diseases, especially the role of school teachers  
365 in the application of those practices.

366 This systematic review intends to contribute information about the positive impact  
367 of conducting educational interventions on a globally important health problem. For that  
368 purpose, we consider that having indicators of the efficacy of interventions helps to  
369 improve the design of the intervention.

370 The terms used in the literature search were selected with the aim to incorporate  
371 all the articles with information about the impact of educational interventions on vector  
372 prevention practices or entomological indicators. However, a weakness of our study is  
373 that some articles that do provide information about the impact of educational

374 interventions in the text may have been overlooked because the descriptors we used were  
375 not included in the titles or abstracts. Finally, this systematic review did not aim to  
376 evaluate the quality of the educational interventions implemented or the method used and  
377 the subsequent published data.

378 In conclusion, those designing or implementing educational interventions should  
379 strengthen the evaluation of such interventions using qualitative approaches that provide  
380 a comprehensive picture of the social context and barriers/facilitators to vector control  
381 implementation. Future evaluations of the relationship between community mobilization  
382 and prevention of arboviruses could include entomological indicators that provide  
383 information to assess whether people adopt practices to reduce or eliminate vectors, along  
384 with active surveillance studies and serological surveys to measure changes in disease  
385 transmission before and after the educational intervention. From a health education policy  
386 perspective, engaging school children in cross-sectorial collaborations that link the health  
387 and education spheres is essential, thereby promote community participation in vector  
388 surveillance.

## 389 **Acknowledgments**

390 We thank Jorgelina Brasca for the grammar and style revision of the language.

## 391 **References**

- 392 1. Weaver SC. Prediction and prevention of urban arbovirus epidemics: A challenge for  
393 the global virology community. *Antiviral research*. 2018; 156: 80–84.
- 394 2. Kamal M, Kenawy MA, Rady MH, Khaled AS, Samy AM. Mapping the global  
395 potential distributions of two arboviral vectors *Aedes aegypti* and *Ae. albopictus* under  
396 changing climate. *PLoS ONE*. 2018; 13(12): e0210122.  
397 <https://doi.org/10.1371/journal.pone.0210122>

- 398 3. Robert M, Tinunin DT, Benitez E, Ludueña-Almeida F, Romero M, Stewart-Ibarra  
399 A, et al. Arbovirus emergence in the temperate city of Córdoba, Argentina, 2009–  
400 2018. *Sci Data*. 2019; 6: 276. <https://doi.org/10.1038/s41597-019-0295-z>
- 401 4. Messina JP, Brady OJ, Pigott DM, Golding N, Kraemer MU, Scott TW, et al. The  
402 many projected futures of dengue. *Nat Rev Microbiol*. 2015; 13 (4):230–9.
- 403 5. World Health Organization. Dengue and severe dengue, Factsheet No. 117. WHO.  
404 2012. Available [https://www.who.int/es/news-room/fact-sheets/detail/dengue-and-](https://www.who.int/es/news-room/fact-sheets/detail/dengue-and-severe-dengue)  
405 [severe-dengue](https://www.who.int/es/news-room/fact-sheets/detail/dengue-and-severe-dengue). Accessed 1st July 2022.
- 406 6. Outammassine A, Zouhair S, Loqman S. Global potential distribution of three  
407 underappreciated arboviruses vectors (*Aedes japonicus*, *Aedes vexans* and *Aedes*  
408 *vittatus*) under current and future climate conditions. *Transbound Emerg Dis*. 2022;  
409 69(4): e1160-e1171.
- 410 7. Paixão ES, Teixeira MG, Rodrigues LC. Zika, chikungunya and dengue: the causes  
411 and threats of new and re-emerging arboviral diseases. *BMJ global health*. 2018;  
412 3(Suppl 1), e000530.
- 413 8. Achee NL, Gould F, Perkins TA, Reiner RC Jr., Morrison AC, Ritchie SA, et al. A  
414 Critical Assessment of Vector Control for Dengue Prevention. *PLoS Negl Trop Dis*.  
415 2015; 9(5): e0003655. doi:10.1371/ journal.pntd.0003655.
- 416 9. Boccia T, Burattini M, Coutinho F, Massad E. Will people change their vector-control  
417 practices in the presence of an imperfect dengue vaccine? *Epidemiology & Infection*.  
418 2014; 142(3): 625–633.
- 419 10. World Health Organization. Dengue Guidelines for Diagnosis, Treatment, Prevention  
420 and Control. World Health Organization. 2009: 1–197.
- 421 11. Ouédraogo S, Benmarhnia T, Bonnet E, Somé P, Barro A, Kafando Y, et al.  
422 Evaluation of effectiveness of a community-based intervention for control of dengue  
423 virus vector, Ouagadougou, Burkina Faso. *Emerging infectious diseases*. 2018;  
424 24(10): 1859 – 1867.
- 425 12. Pan American Health Organization. Dengue and dengue hemorrhagic fever in the  
426 Americas: guidelines for prevention and control. Scientific publication no. 548.  
427 Washington: The Organization. 1994.
- 428 13. Diaz-Gonzalez EE, Danis-Lozano R, Peñaloza G. Schools as centers for health  
429 educational initiatives, health behavior research and risk behavior for dengue  
430 infection in school children and community members: a systematic review. *Health*  
431 *Educ Res*. 2020; 35(5): 376–395.

- 432 14. Renganathan E, Parks W, Lloyd L, Nathan MB, Hosein E, Odugleh A, et al. Towards  
433 sustaining behavioural impact in dengue prevention and control. *Dengue Bull.* 2003;  
434 27: 6–12.
- 435 15. Focks D. A review of entomological sampling methods and indicators for dengue  
436 vectors. UNDP/World Bank/WHO Special Programme for Research and Training in  
437 Tropical Diseases. 2004:1–40.  
438 Available: <https://apps.who.int/iris/handle/10665/68575>. Accessed 1st July 2022.
- 439 16. Abel Manguera FF, Smania-Marques R, Dutra Fernandes I, Alves Albino V, Olinda  
440 R, Acácia Santos-Silva T, et al. The prevention of arboviral diseases using mobile  
441 devices: a preliminary study of the attitudes and behaviour change produced by  
442 educational interventions. *Trop Med Int Health.* 2019 Nov 10; 24(12): 1411–1426.
- 443 17. AhbiRami R, Zuharah WF. School-based health education for dengue control in  
444 Kelantan, Malaysia: Impact on knowledge, attitude and practice. *PLoS Negl Trop Dis.*  
445 2020; 14(3): e0008075.
- 446 18. Andersson N, Nava-Aguilera E, Arosteguí J, Morales-Perez A, Suazo-Laguna H,  
447 Legorreta-Soberanis J, et al. Evidence based community mobilization for dengue  
448 prevention in Nicaragua and Mexico (Camino Verde, the Green Way): cluster  
449 randomized controlled trial. *BMJ.* 2015 Jul 8:h3267.
- 450 19. Ávila Montes GA, Araujo R, Leontsini E, Orellana Herrera G, Fernández Cerna E.  
451 Un programa escolar para el control del dengue en Honduras: del conocimiento a la  
452 práctica. *Rev Panam Salud Publica.* 2012 Jun; 31(6): 518–522. Spanish.
- 453 20. Caprara A, De Oliveira Lima JW, Rocha Peixoto AC, Vasconcelos Motta CM, Soares  
454 Nobre JM, Sommerfeld J, et al. Entomological impact and social participation in  
455 dengue control: a cluster randomized trial in Fortaleza, Brazil. *Trans R Soc Trop Med*  
456 *Hyg.* 2015 Feb; 109 (2): 99–105.
- 457 21. Carabalí M, Ocampo CB, Toledo ME, Osorio L. Difusión masiva de reportes  
458 situacionales sobre dengue: efectos de la intervención en Guadalajara de Buga,  
459 Colombia. *Biomedica.* 2013 Aug 13; 33:130–141. Spanish.
- 460 22. Cordeiro da Silva P, Mesaque Martins A, Torres Schall V. Cooperação entre agentes  
461 de endemias e escolas na identificação e controle da dengue. *Revista brasileira em*  
462 *promoção da saúde.* 2013; 26: 404–411. Portuguese.

- 463 23. Criado Morales MLC, Martínez YMC, Mejia P, Cáceres HM, Cabrera H, Chacón  
464 DJ, et al. Procesos de participación comunitaria en la prevención del dengue barrio  
465 ciudadela del fonce. *Cultura del Cuidado Enfermería*. 2016; 13 (2):29–42. Spanish.
- 466 24. Echaubard P, Thy C, Sokha S, Srun S, Nieto-Sanchez C, Grietens et al. Fostering  
467 social innovation and building adaptive capacity for dengue control in Cambodia: a  
468 case study. *Infect Dis Poverty*. 2020; 9 (05):93–104.
- 469 25. Escobar Ramírez MC, Arango Vasco ME, Tejada Rivera NM. Efectividad de la  
470 estrategia para la prevención del dengue en un barrio del municipio de Floridablanca  
471 2011-2012. *Revista Cuidarte*. 2013; 4 (1):493–501. Spanish.
- 472 26. Escudero-Támara E, Villareal-Amaris G. Intervención educativa para el control del  
473 dengue en entornos familiares en una comunidad de Colombia. *Rev Peru Med Exp*  
474 *Salud Publica*. 2015; 32 (1):19–25. Spanish.
- 475 27. García Guevara B, Lugo Lugo N, Salgado Sabel A. Una mirada etnográfica del  
476 conocimiento del dengue desde la perspectiva de un grupo de escolares: Unidad  
477 Educativa Nacional Bolivariana" Armando Zuloaga Blanco" Distrito Capital,  
478 Venezuela. 2009. *Comunidad y Salud*. 2011; 9 (1):14–26. Spanish.
- 479 28. Isa A, Loke YK, Smith JR, Papageorgiou A, Hunter PR. Mediation effects of self-  
480 efficacy dimensions in the relationship between knowledge of dengue and dengue  
481 preventive behaviour with respect to control of dengue outbreaks: a structural  
482 equation model of a cross-sectional survey. *PLoS Negl Trop Dis*. 2013; 7 (9):e2401.
- 483 29. Jaramillo JF, Vargas S, Sarmiento-Senior D, Giraldo P. Sostenibilidad en  
484 intervenciones para la prevención de dengue y diarrea en escuelas rurales de dos  
485 municipios de Colombia: evaluación de dos años post-proyecto. *Cad Saude Publica*.  
486 2018; 34: e00189017. Spanish.
- 487 30. Kittayapong P, Thongyuan S, Olanratmanee P, Aumchareoun W, Koyadun S,  
488 Kittayapong R, et al. Application of eco-friendly tools and eco-bio-social strategies  
489 to control dengue vectors in urban and peri-urban settings in Thailand. *Pathogens and*  
490 *Global Health*. 2012; 106 (8):446–454.
- 491 31. Nivedita G. Knowledge, attitude, behaviour and practices (KABP) of the community  
492 and resultant IEC leading to behaviour change about dengue in Jodhpur City,  
493 Rajasthan. *J Vector Borne Dis*. 2016; 53(3):279–282.
- 494 32. Ortiz Agui M, Villar Carbajal EI, Llanos de Tarazona MI. Estrategia comunicativa  
495 orientada a la reducción de la exposición a factores de riesgo de arbovirosis. *MediSur*.  
496 2020; 18 (2):161–170. Spanish.



- 497 33. Overgaard HJ, Alexander N, Matiz MI, Jaramillo JF, Olano VA, Vargas S et al. A  
498 Cluster-Randomized Controlled Trial to Reduce Diarrheal Disease and Dengue  
499 Entomological Risk Factors in Rural Primary Schools in Colombia. *PLoS Negl Trop*  
500 *Dis.* 2016; 10 (11): e0005106.
- 501 34. Radhika NML, Gunathilaka N, Udayanga L, Kasturiratne A, Abeyewickreme W.  
502 Level of awareness of dengue disease among school children in Gampaha district, Sri  
503 Lanka, and effect of school-based health education programmes on improving  
504 knowledge and practices. *Biomed Res Int.* 2019 Jun 19; 2019: 3092073.
- 505 35. Restrepo BN, Pineda J, Parra Henao GJ. Aplicación y evaluación de materiales  
506 educativos para la prevención del dengue en una institución educativa de Medellín,  
507 Colombia. *CES Medicina.* 2011; 25(1): 31–41. Spanish.
- 508 36. Sommerfeld J, Kroeger A. Eco-bio-social research on dengue in Asia: a multicountry  
509 study on ecosystem and community-based approaches for the control of dengue  
510 vectors in urban and peri-urban Asia. *Pathog Glob Health.* 2012; 106: 428–35.
- 511 37. Torres JL, Ordóñez JG, Vázquez-Martínez MG. Conocimientos, actitudes y prácticas  
512 sobre el dengue en las escuelas primarias de Tapachula, Chiapas, México. *Rev Panam*  
513 *Salud Publica.* 2014; 35 (3): 214–218. Spanish.
- 514 38. Villarreal G, Amed E, Pérez L. Intervención educativa para control de *Aedes Aegypti*  
515 en un grupo de familias colombianas: una experiencia exitosa. *Comunidad y Salud.*  
516 2017; 15(2):14–23. Spanish.
- 517 39. Zayas Vinent M, Cruz Llaugert J, Torres Sarmiento A, Salinas Duany P. La  
518 intersectorialidad en la prevención del dengue en un área de salud de Santiago de  
519 Cuba. *MEDISAN.* 2012; 16(2):175–181. Spanish.
- 520 40. Arunachalam N, Tyagi BK, Samuel M, Krishnamoorthi R, Manavalan R, Tewari SC,  
521 et al. Community-based control of *Aedes aegypti* by adoption of eco-health methods  
522 in Chennai City, India. *Pathog Glob Health.* 2012; 106(8): 488–496.
- 523 41. Mitchell-Foster K, Ayala E, Breilh J, Spiegel J, Wilches A, Leon T, Delgado J.  
524 Integrating participatory community mobilization processes to improve dengue  
525 prevention: an eco-bio-social scaling up of local success in Machala, Ecuador. *Trans*  
526 *R Soc Trop Med Hyg.* 2015; 109(2), 126–133.
- 527 42. Varona Delmonte M, Pernas Álvarez I, Socarrás Sánchez S, Bancol Ibert M.  
528 Estrategia educativa antitabáquica para estudiantes de Tecnología de la Salud de  
529 Camagüey. *Humanidades Medicas.* 2015; 15 (2): 262–282. Spanish.



- 530 43. Moher D, Pham B, Lawson M, Klassen T. The inclusion of reports of randomised  
531 trials published in languages other than English in systematic reviews. *Health Technol*  
532 *Assess.* 2003; 7: 41–98.
- 533 44. Paupy C, Delatte H, Bagny L, Corbel V, Fontenille D. *Aedes albopictus*, an arbovirus  
534 vector: From the darkness to the light. *Microbes and infection* 2009; 11(14-15): 1177-  
535 1185.
- 536 45. Grard G, Caron M, Mombo IM, Nkoghe D, Ondo SM, et al. (2014) Zika Virus in  
537 Gabon (Central Africa) – 2007: A New Threat from *Aedes albopictus*? *PLoS Negl*  
538 *Trop Dis* 8(2): e2681. doi:10.1371/journal.pntd.0002681.
- 539 46. Ayllón T, Câmara DCP, Morone FC, Gonçalves LdS, Saito Monteiro de Barros F,  
540 Brasil P, et al. (2018) Dispersion and oviposition of *Aedes albopictus* in a Brazilian  
541 slum: Initial evidence of Asian tiger mosquito domiciliation in urban environments.  
542 *PLoS ONE* 13(4): e0195014. <https://doi.org/10.1371/journal.pone.0195014>.
- 543 47. Bang C. Debates y controversias sobre el concepto de participación comunitaria en  
544 salud: una revisión histórica. *Rev Eä-Human Med Est Soc Cienc Tecnol.* 2011;  
545 3(2):1–23. Spanish.
- 546 48. Al-Muhandis N, Hunter PR. The value of educational messages embedded in a  
547 community-based approach to combat dengue fever: a systematic review and meta-  
548 regression analysis. *PLoS Negl Trop Dis* 2011; 5: e1278.
- 549 49. Vazquez-Torres C, López-Gómez J, Martínez-Riera JR. Abordaje de las arbovirosis  
550 desde la perspectiva comunitaria. *RIDEC* 2019; 12(2):47–60. Spanish.
- 551 50. Diaz-Gonzalez EE, Danis-Lozano R, Peñaloza G. Schools as centers for health  
552 educational initiatives, health behavior research and risk behavior for dengue  
553 infection in school children and community members: a systematic review. *Health*  
554 *Educ Res.* 2020; 35(5): 376–395.
- 555 51. Kwon D, Crizaldo R. A knowledge, attitudes, and practices (KAP) study on dengue  
556 fever among the Rowenas community in the Philippines. *The Mediator* 2004; 10(1):  
557 1-21.
- 558 52. Ganem A, Tuesca R. Promoción de la salud y prevención del dengue: implementación  
559 de la metodología -combi- en tres barrios del distrito de Barranquilla, Colombia.  
560 *Salud Jalisco.* 2018; 5: 82–92. Spanish.
- 561 53. Benítez-Díaz L, Diaz-Quijano FA, Martínez-Vega RA. Experiencia y percepción del  
562 riesgo asociados a conocimientos, actitudes y prácticas sobre dengue en Riohacha,  
563 Colombia. *Cien Saude Colet.* 2020; 25: 1137–1146. Spanish.

- 564 54. Bevilacqua M, Morales L G, Cárdenas L, Domínguez J. Intervención educativa para  
565 modificar conocimientos, actitudes y prácticas sobre la malaria en escolares indígenas  
566 Ye' kwana. *Bol Malariol Salud Ambient.* 2015; 55(2):155–164. Spanish.
- 567 55. Rosecrans K, Cruz-Martin G, King A, Dumonteil E. Opportunities for improved  
568 Chagas disease vector control based on knowledge, attitudes and practices of  
569 communities in the Yucatan Peninsula, Mexico. *PLoS neglected tropical diseases.*  
570 2014; 8(3): e2763.
- 571 56. Desjardins MR, Casas I, Victoria AM, Carbonell D, Dávalos DM, Delmelle EM.  
572 Knowledge, attitudes, and practices regarding dengue, chikungunya, and Zika in Cali,  
573 Colombia. *Health Place.* 2020; 63:102339.
- 574 57. Ballenger-Browning K, Elder J. Multi-modal *Aedes aegypti* mosquito reduction  
575 interventions and dengue fever prevention. *Trop Med Int Health.* 2009; 14(12): 1542–  
576 1551.
- 577 58. Heintze C, Velasco Garrido M, Kroeger A. What do community-based dengue control  
578 programmes achieve? A systematic review of published evaluations. *Trans R Soc Trop*  
579 *Med Hyg.* 2007; 101:317–325.
- 580 59. Erlanger T, Keizer J, Utzinger J. Effect of dengue vector control interventions on  
581 entomological parameters in developing countries: a systematic review and  
582 meta-analysis. *Med Vet Entomol.* 2008; 22: 203–221.
- 583 60. Souza SC, Carneiro M, Eiras AE, Bezerra JMT, Barbosa DS. Factors associated with  
584 the occurrence of dengue epidemics in Brazil: a systematic review. *Rev Panam Salud*  
585 *Publica.* 2021; 45:e84.
- 586 61. Leandro AS, de Castro WAC, Lopes RD, Delai RM, Villela DA, De-Freitas R M.  
587 Citywide Integrated *Aedes aegypti* Mosquito Surveillance as Early Warning System  
588 for Arbovirus Transmission, Brazil. *Emerg Infect Dis.* 2022; 28(4): 707.
- 589 62. Bardach A, García-Perdomo H, Alcaraz A, Tapia Lopez E, Gándara R, Ruvinsky S, et  
590 al. Interventions for the control of *Aedes aegypti* in Latin America and the Caribbean:  
591 systematic review and meta-analysis. *Trop Med Int Health.* 2019; 24(5): 530–552.
- 592 63. Lima E, Goulart M, Rolim Neto M. Meta-analysis of studies on chemical, physical  
593 and biological agents in the control of *Aedes aegypti*. *BMC public health.* 2015; 15(1):  
594 1–14.
- 595 64. Bouzid M, Brainard J, Hooper L, Hunter PR. Public Health Interventions for *Aedes*  
596 Control in the Time of Zika virus– A Meta-Review on Effectiveness of Vector Control  
597 Strategies. *PLoS Negl Trop Dis.* 2016; 10(12): e0005176.

- 598 65. Crocco L, López A, Rodríguez C, Catalá S. Controlando la Enfermedad de Chagas  
599 desde la escuela: módulos educativos. *Revista de Educación en Biología*. 2010;  
600 13(2):16. Spanish.
- 601 66. Bianchi T, dos Santos C, Jeske S, Grala A, de Moura M, Madia D, et al. Health  
602 education in chagas disease control: making an educational video. *Journal of Tropical*  
603 *Pathology*. 2018; 47(2): 116–124.
- 604 67. Gregorio J, Medina J, Lomboy M, Talaga A, Hernandez P, Kodama M, Kobayashi J.  
605 Knowledge, attitudes, and practices of public secondary school teachers on Zika Virus  
606 Disease: A basis for the development of evidence-based Zika educational materials for  
607 schools in the Philippines. *PloS one*. 2019; 14(3): e0214515.
- 608 68. Ayi I, Nonaka D, Adjovu J, Hanafusa S, Jimba M, Bosompem K, et al. School-based  
609 participatory health education for malaria control in Ghana: engaging children as  
610 health messengers. *Malaria journal*. 2010; 9(1): 1–12.
- 611 69. Gupta S, Patil R, Kumar A, Wani O A. An impact of educational intervention programs  
612 regarding dengue and its prevention for urban high school children, Pune,  
613 Maharashtra. *International Journal of Scientific Research*. 2016 Oct; 4(10):80–82.

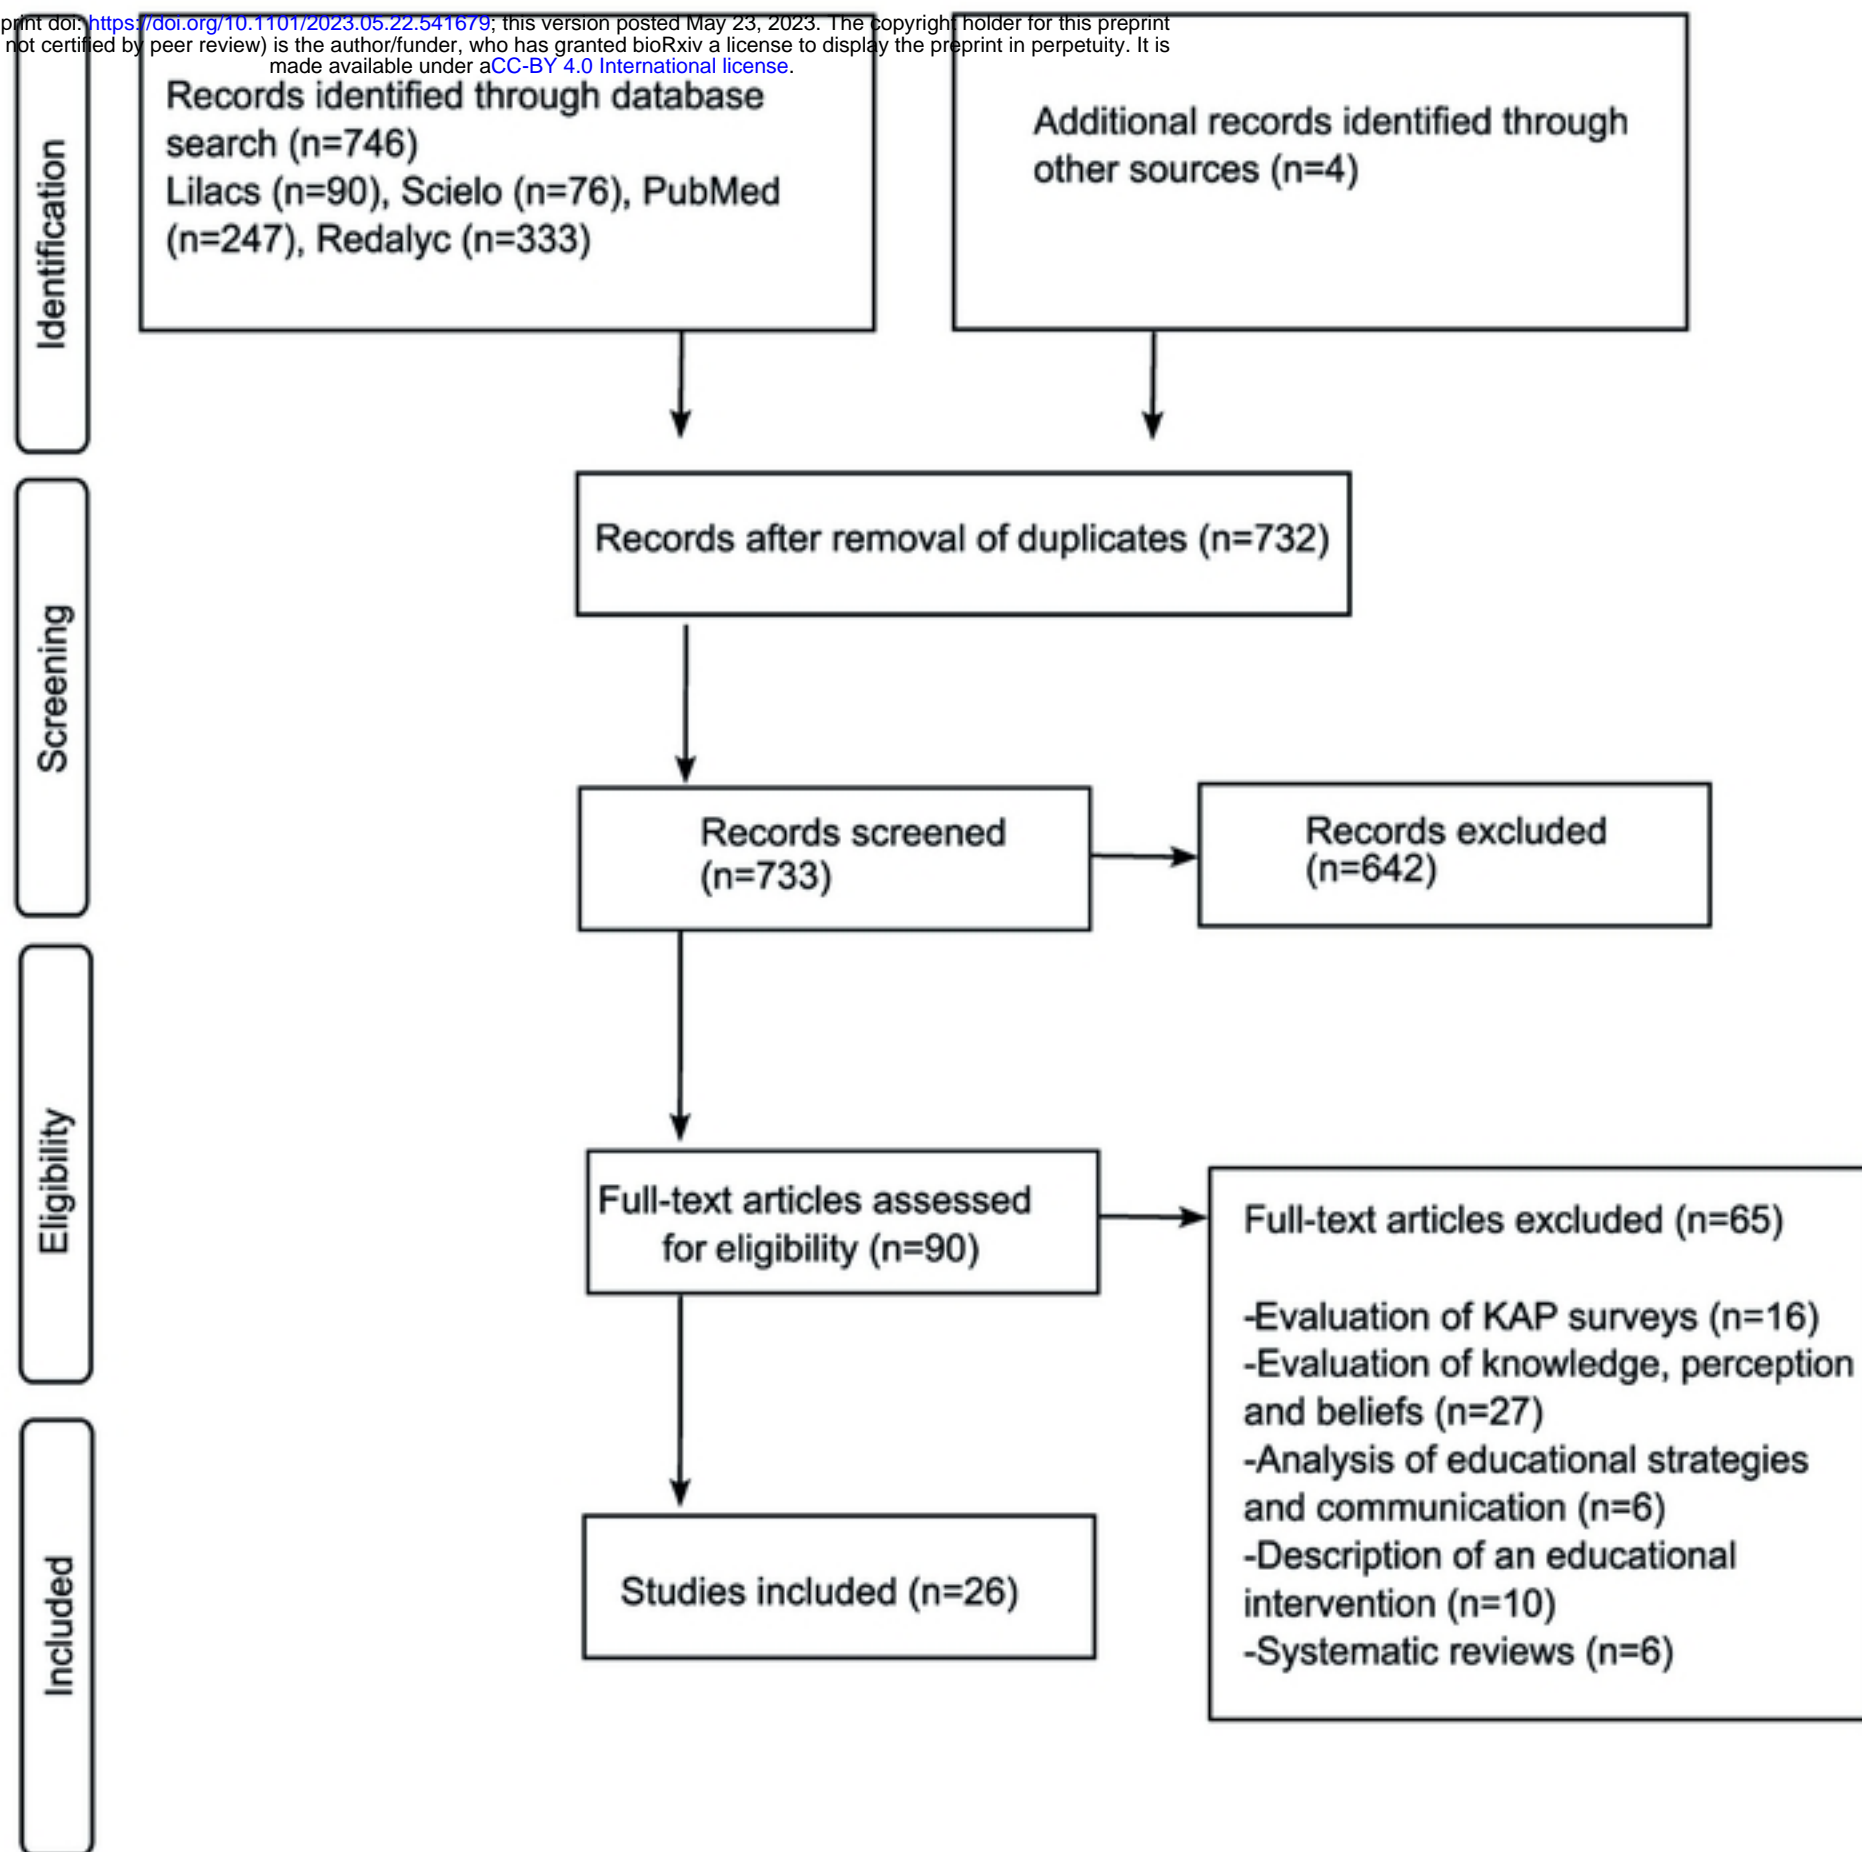

Fig1

### South and Central America

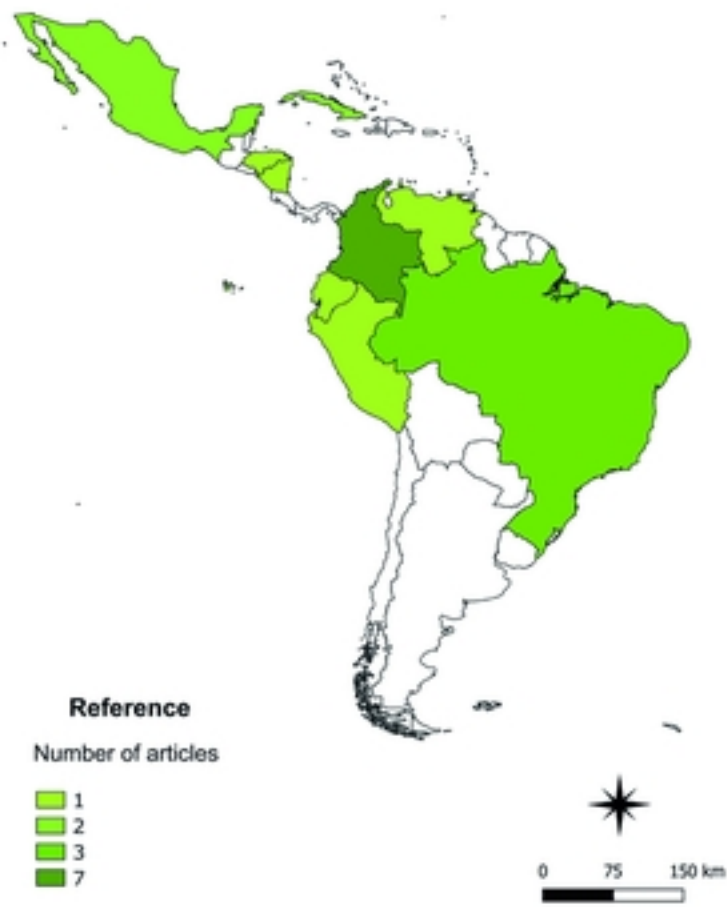

### Asia

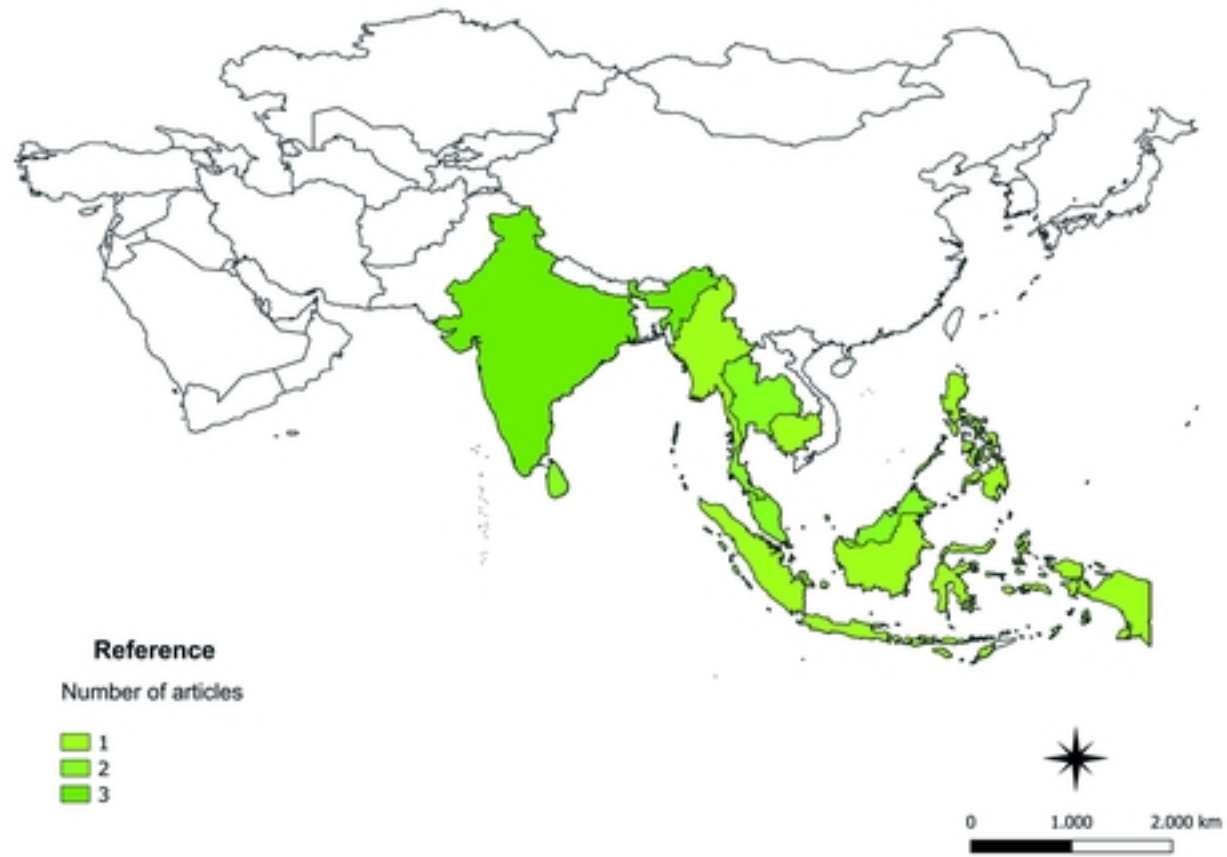

Fig2

**School:**

Graphic materials (leaflets, posters, murals, signs, stickers /decals, banners) [17, 20, 22, 25, 32, 40]

Lecture with graphic support [16, 17, 22, 34, 37]

Education manual for school children [29, 33]

Education manual for teachers [33]

**Community:**

Graphic materials (leaflets, calendar, murals, decals, signs) [20, 21, 23, 25, 26, 30, 36, 38, 40]

**School:**

Group discussion among school children, teachers and researchers [17, 27, 34, 41]

**Community:**

Community discussion workshops [18, 24, 26, 31]

**Community:**

Press conferences about the epidemiological situation [21]

Education campaigns in mass media [21, 24, 26]

**School:**

Recreational workshop [32, 35, 38]

Theater workshop [32]

Radio workshop [32]

Observation of the different development stages of *Aedes aegypti* at the laboratory [37, 41]

**Community:**

Recreational workshop [26]

Construction of a model representing *Aedes aegypti* [26]

**School:**

Monitoring of breeding sites in schools [20, 24, 32, 41]

Participation of school children in household monitoring [19, 37]

**Community:**

House visits to detect breeding sites [18, 19, 20, 23, 26, 30, 36, 39, 41]

Campaign for the elimination of breeding sites in public spaces [28]

**School:** Screening of an audiovisual animated film [32]

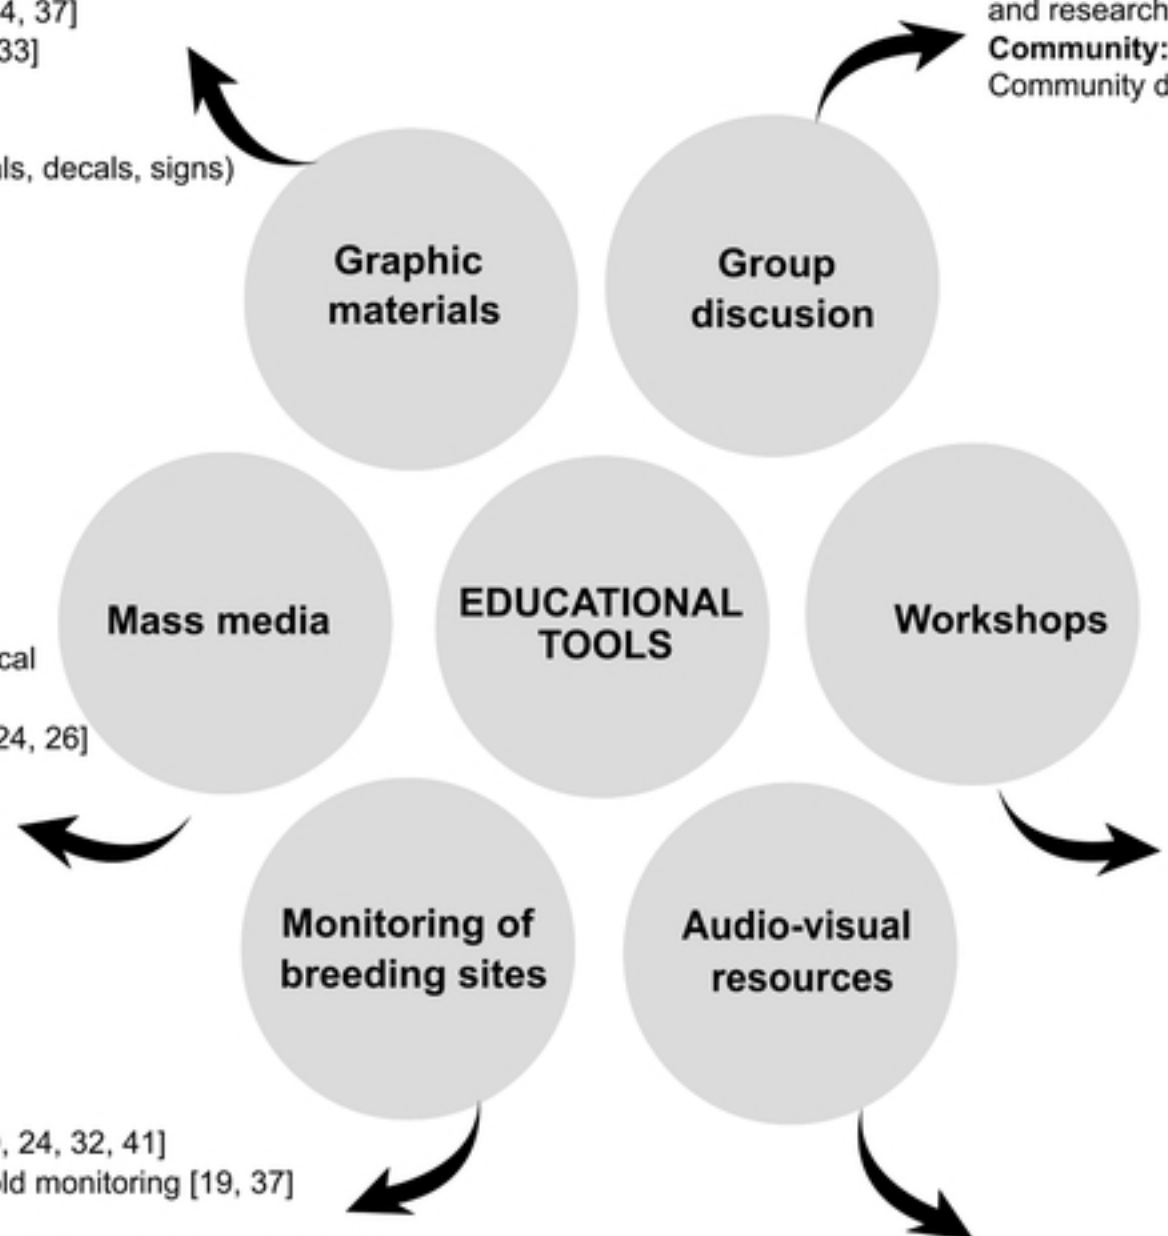

Fig3
